# Supplementary material for: Several strains, one disease: experimental investigation of Vibrio aestuarianus infection parameters in the Pacific oyster, Crassostrea gigas
Source: Springer Nature journal article supplement (doi:10.1186/s13567-017-0438-1), 2017-05-26
Supplement: MOESM1 [file 13567_2017_438_MOESM1_ESM.pdf]

|                   | Bacterial shedding experiments                                                                                                                                                                    |                                                                                                                                                                | Infectious doses experiments                                                                                                                                                                                 |                                                                                                                                                                                                           |                                                                                                                                                                                                           |
|-------------------|---------------------------------------------------------------------------------------------------------------------------------------------------------------------------------------------------|----------------------------------------------------------------------------------------------------------------------------------------------------------------|--------------------------------------------------------------------------------------------------------------------------------------------------------------------------------------------------------------|-----------------------------------------------------------------------------------------------------------------------------------------------------------------------------------------------------------|-----------------------------------------------------------------------------------------------------------------------------------------------------------------------------------------------------------|
|                   | Part I                                                                                                                                                                                            | Part II                                                                                                                                                        | Part I                                                                                                                                                                                                       | Part II                                                                                                                                                                                                   | Part III                                                                                                                                                                                                  |
| Objective         | Individual estimation of bacterial shedding over time                                                                                                                                             | Global estimation of bacterial shedding for different strains                                                                                                  | Estimation of survival in presence of different freshly shedded strains                                                                                                                                      | Accurate estimation of LD50 for our reference strain                                                                                                                                                      | Global estimation of doses inducing 50% of mortality for different freshly shedded strains                                                                                                                |
| Strains           | 02/041-GFP                                                                                                                                                                                        | 02/041-GFP, 02/041, 02/092, 07/115, 12/016, 12/063                                                                                                             | 02/041-GFP, 02/041, 02/092, 07/115, 12/016, 12/063                                                                                                                                                           | 02/041                                                                                                                                                                                                    | 02/041, 02/092, 07/115, 12/016, 12/063                                                                                                                                                                    |
| Dose              | 4 doses (from $5 \times 10^6$ to $5 \times 10^8$ bacteria/animal) + 1 control                                                                                                                     | 1 dose ( $5 \times 10^8$ bacteria/animal)                                                                                                                      | 1 dose ( $1 \times 10^5$ bacteria/ml)                                                                                                                                                                        | 6 doses ( $3 \times 10^3$ to $8 \times 10^5$ bacteria/ml) + 1 control                                                                                                                                     | 3 doses (around $10^4$ to $10^6$ bacteria/ml) + 1 control                                                                                                                                                 |
| Design            | Injection of oysters placed in individual beakers<br><br>Realised twice for 1 dose                                                                                                                | Injection of oysters placed in tanks (triplicate of 10 animals)<br><br>Temporal replicates (2 or 3 times) were realised                                        | 1) Production of contaminated seawater by injecting oysters. Adjustment of bacterial load<br><br>2) Immersion for 24h of sentinelle oysters (triplicate of 10 animal) into undiluted contaminated seawaters. | 1) Production of contaminated seawater by injecting oysters. Dilution of the contaminated seawater.<br><br>2) Immersion for 24h of sentinelle oysters (10 oysters per dose placed in individual beakers). | 1) Production of contaminated seawater by injecting oysters. Dilution of the contaminated seawater.<br><br>2) Immersion for 24h of sentinelle oysters (10 oysters per dose placed in individual beakers). |
| Number of oysters | 60 oysters                                                                                                                                                                                        | 540 oysters                                                                                                                                                    | 350 oysters<br><br>Sources : 20 per strain + control<br><br>Sentinelles : 30 per strain + control                                                                                                            | 90 oysters<br><br>Sources : 20 + control<br><br>Sentinelles : 10 per dose + control                                                                                                                       | 280 oysters<br><br>Sources : 20 per strain + control<br><br>Sentinelles : 10 per dose per strain + control                                                                                                |
| Monitoring        | Sampling of seawater at different timepoints (0; 0.5; 1; 2; 23; 30; 50 hours), and mortality recording<br><br> | Sampling of seawater at 19h post-injection, and mortality recording<br><br> | Mortality recording and analyses of moribund animals<br><br>                                                            | Mortality recording and analyses of moribund animals<br><br>                                                         | Mortality recording and analyses of moribund animals<br><br>                                                         |
